# Supplementary material for: Effectiveness of Acceptance and Commitment Therapy in Central Pain Sensitization Syndromes: A Systematic Review
Source: MDPI journal article supplement (doi:10.3390/jcm10122706), 2021-06-19

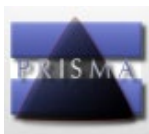

## PRISMA 2009 Flow Diagram \_ Fibromyalgia Syndrome

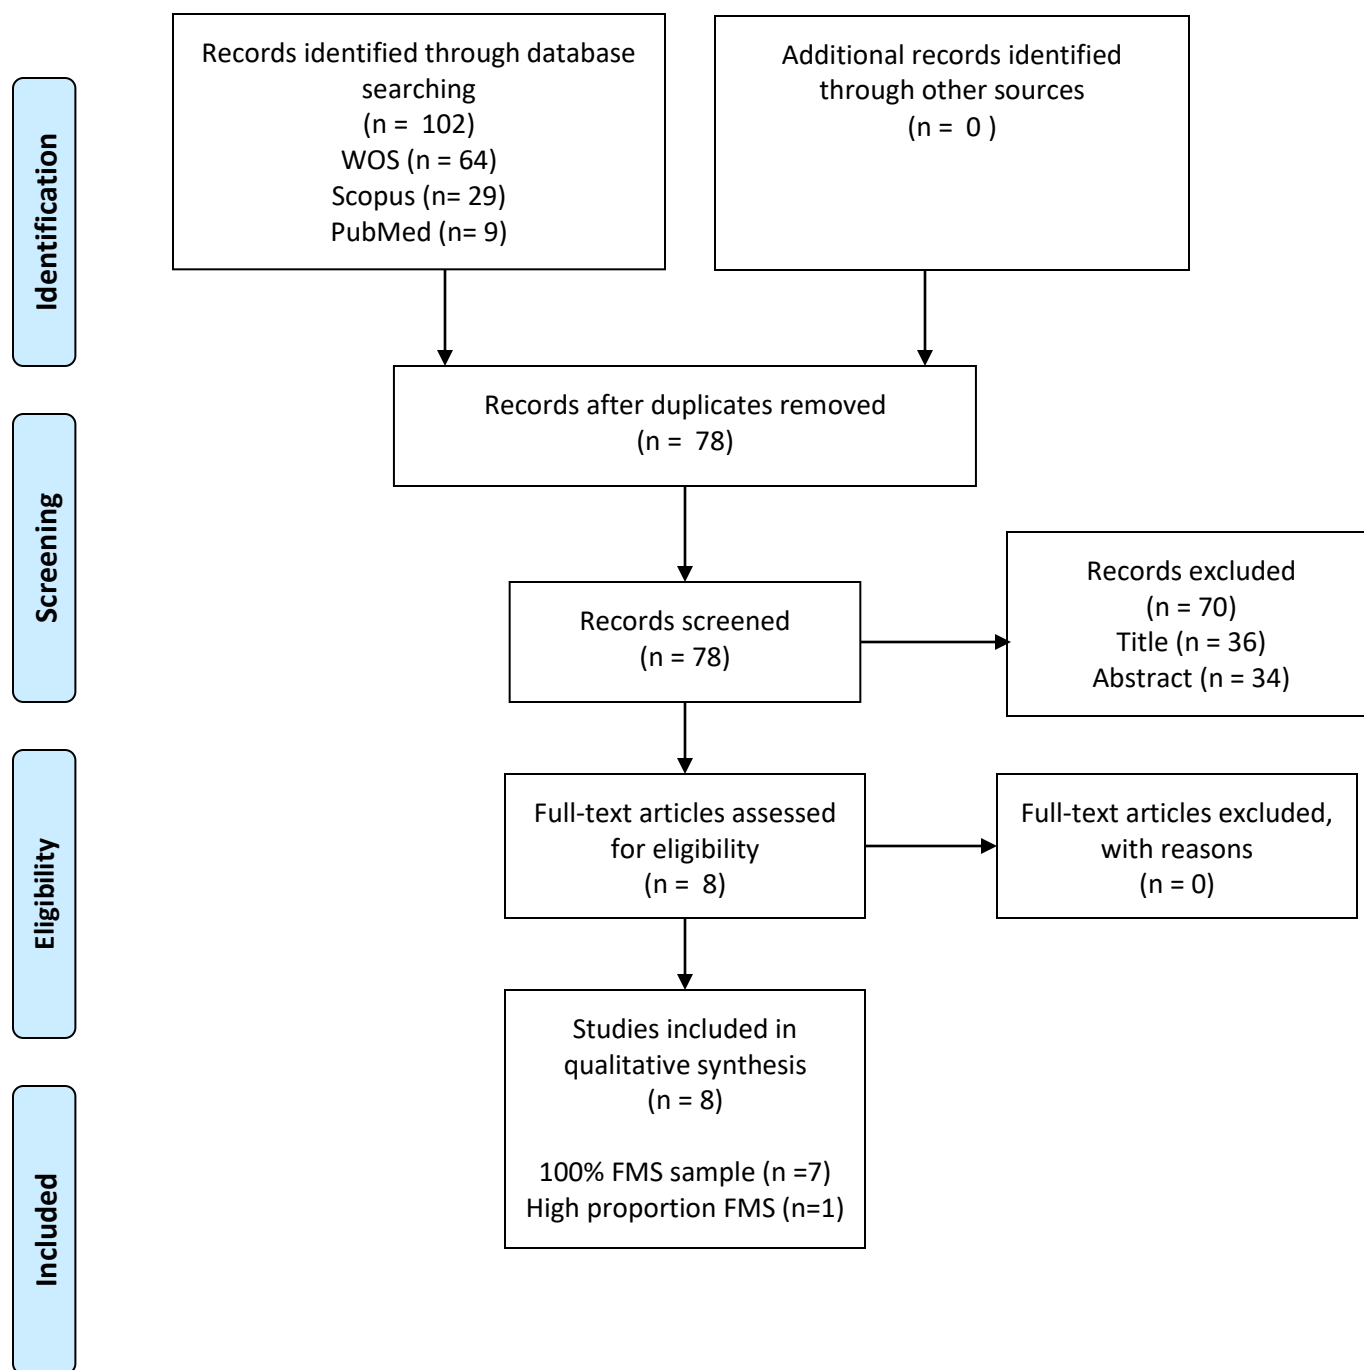

**Note:** FMS = Fibromyalgia Syndrome.

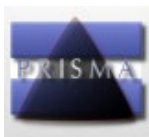

## PRISMA 2009 Flow Diagram \_ Irritable Bowel Syndrome

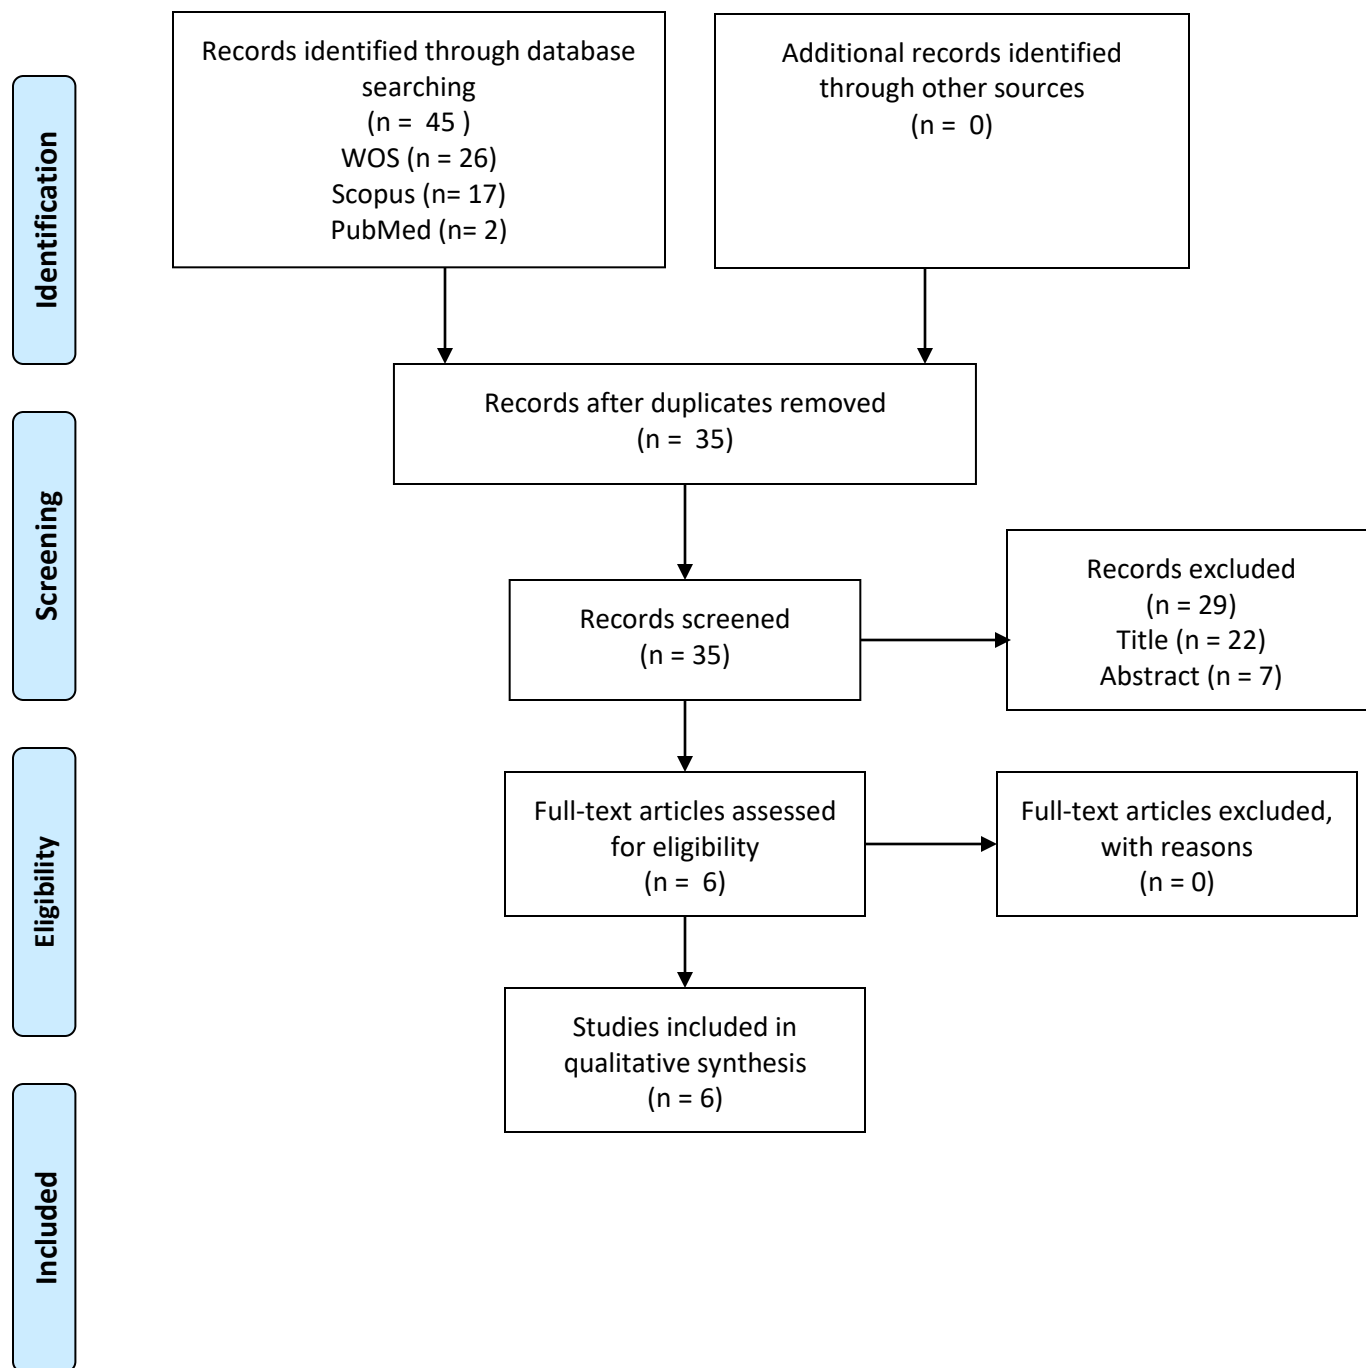

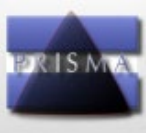

## PRISMA 2009 Flow Diagram \_ Interstitial Cystitis

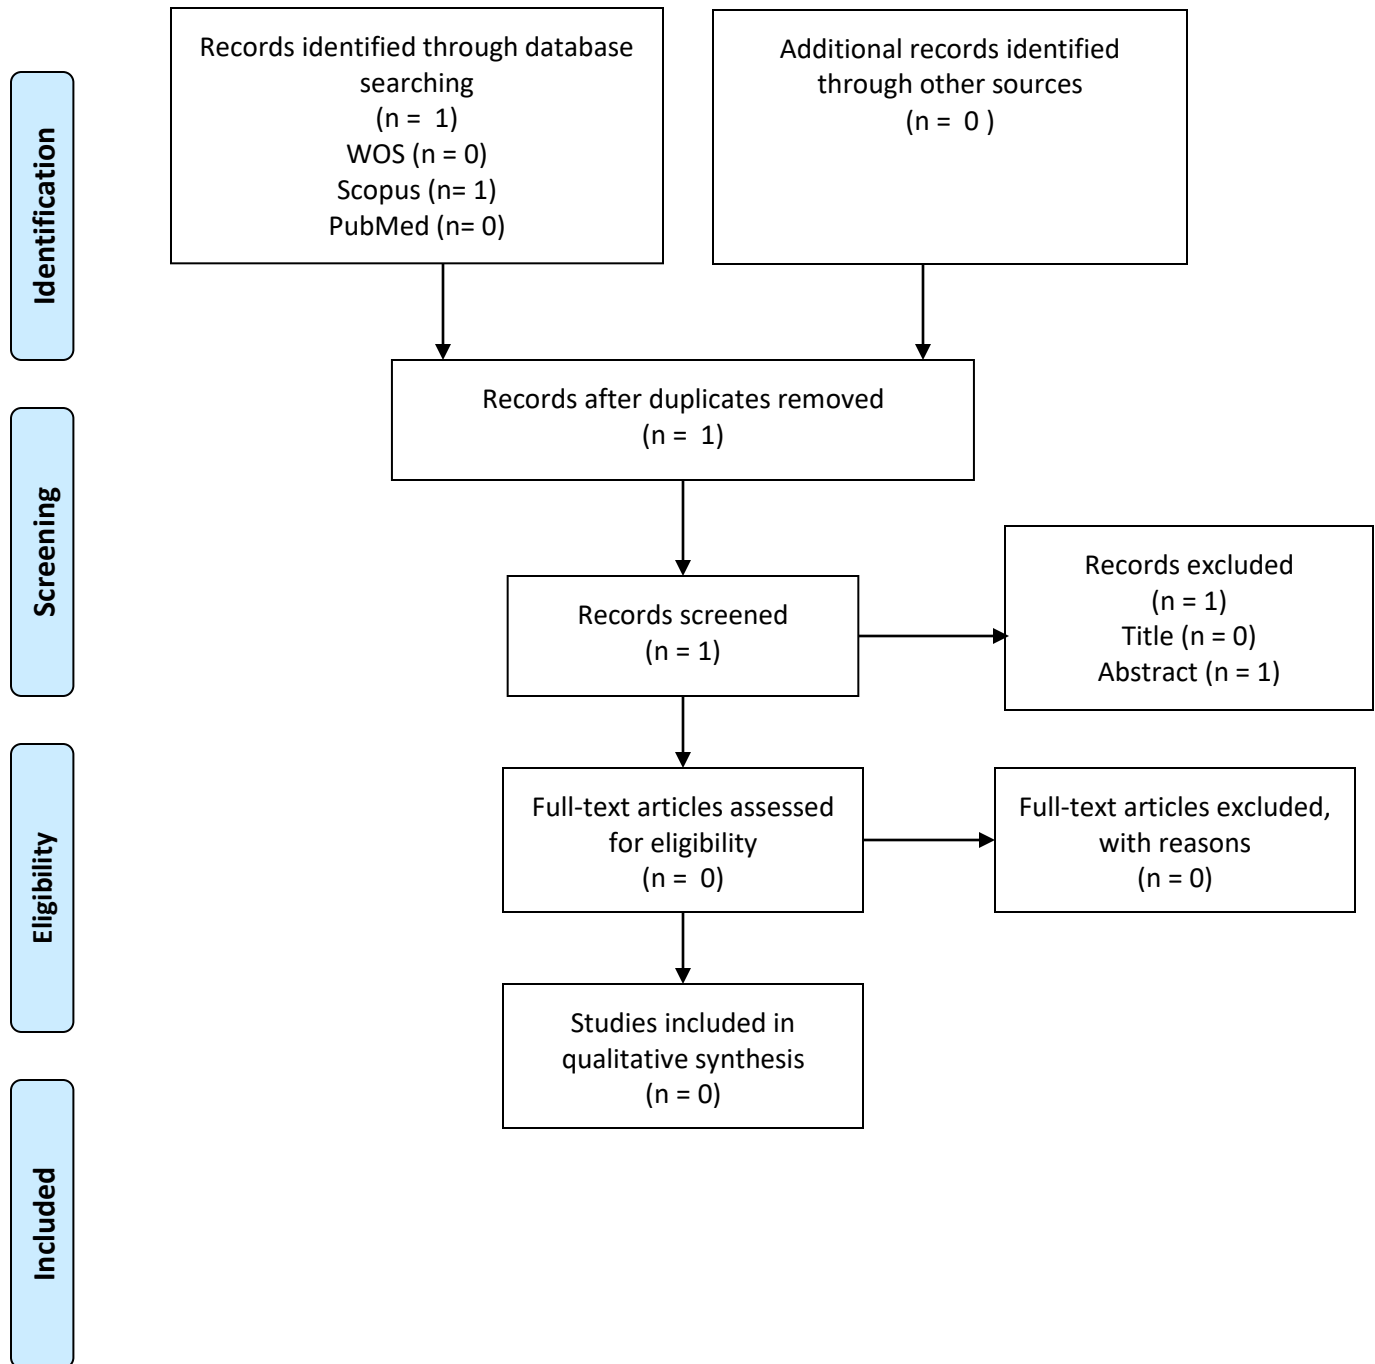



## PRISMA 2009 Flow Diagram \_ Temporomandibular Disorder

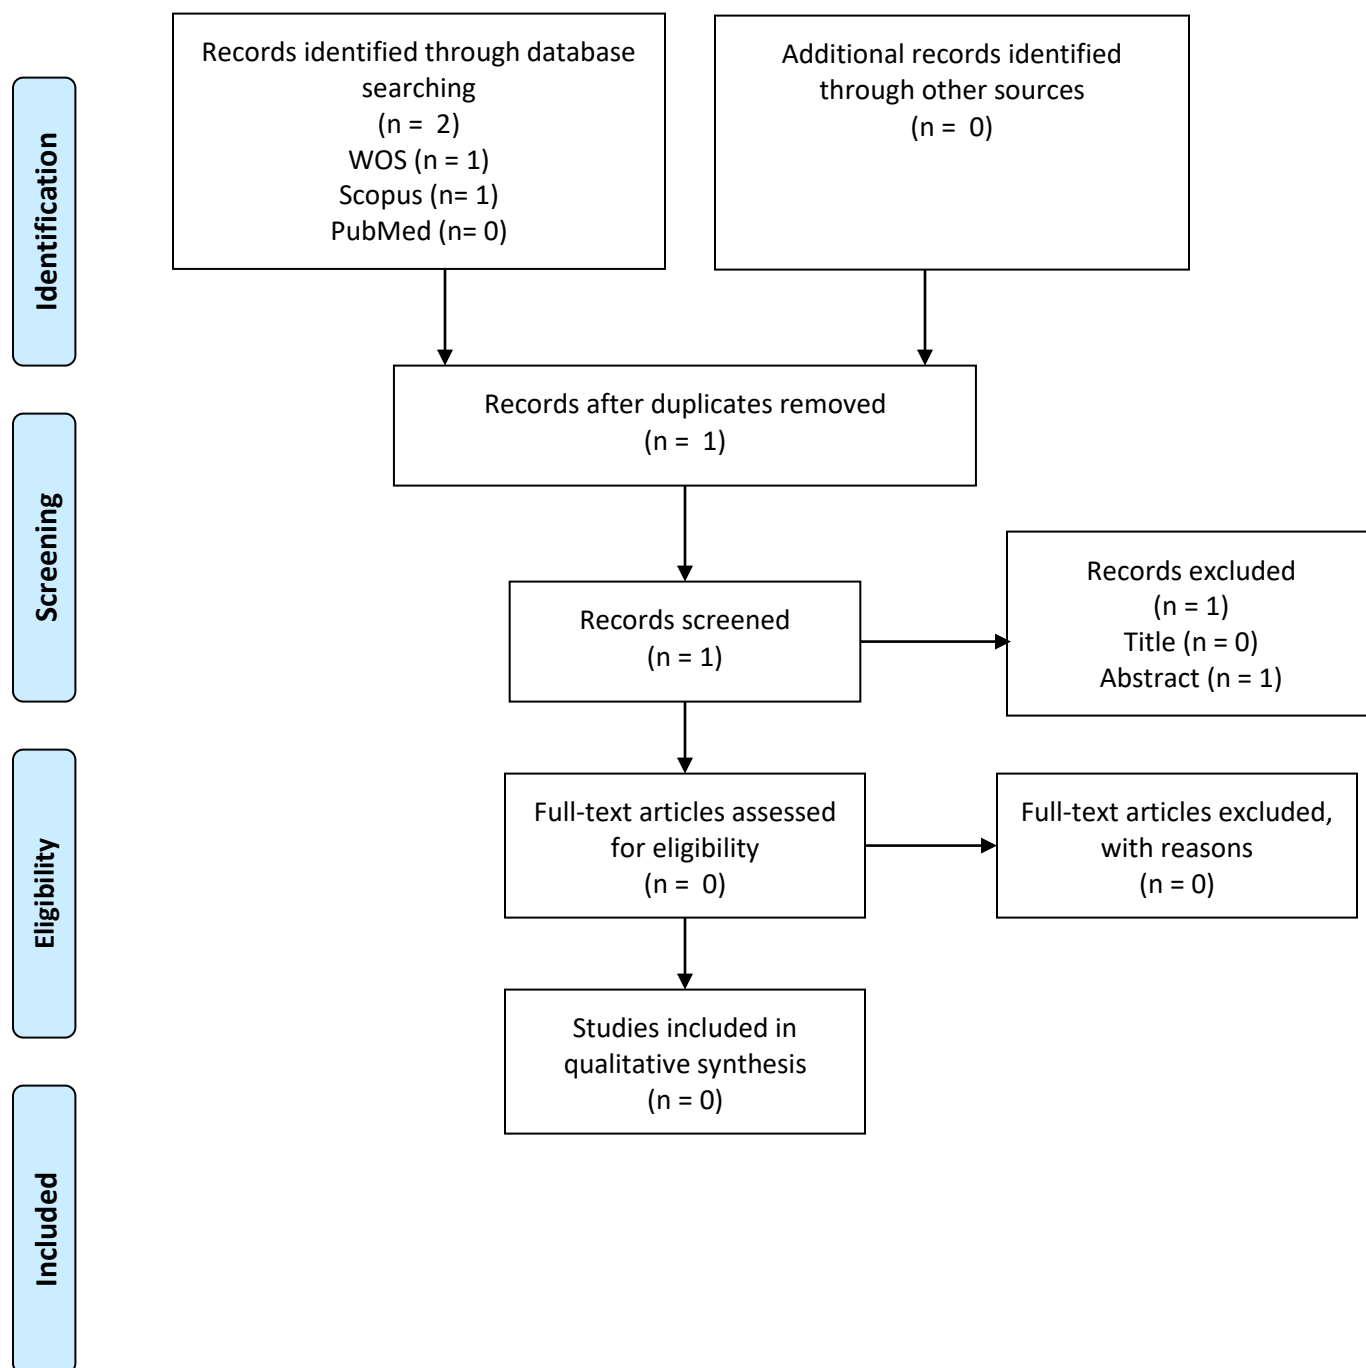

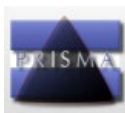

## PRISMA 2009 Flow Diagram \_ Chronic tension-type headache

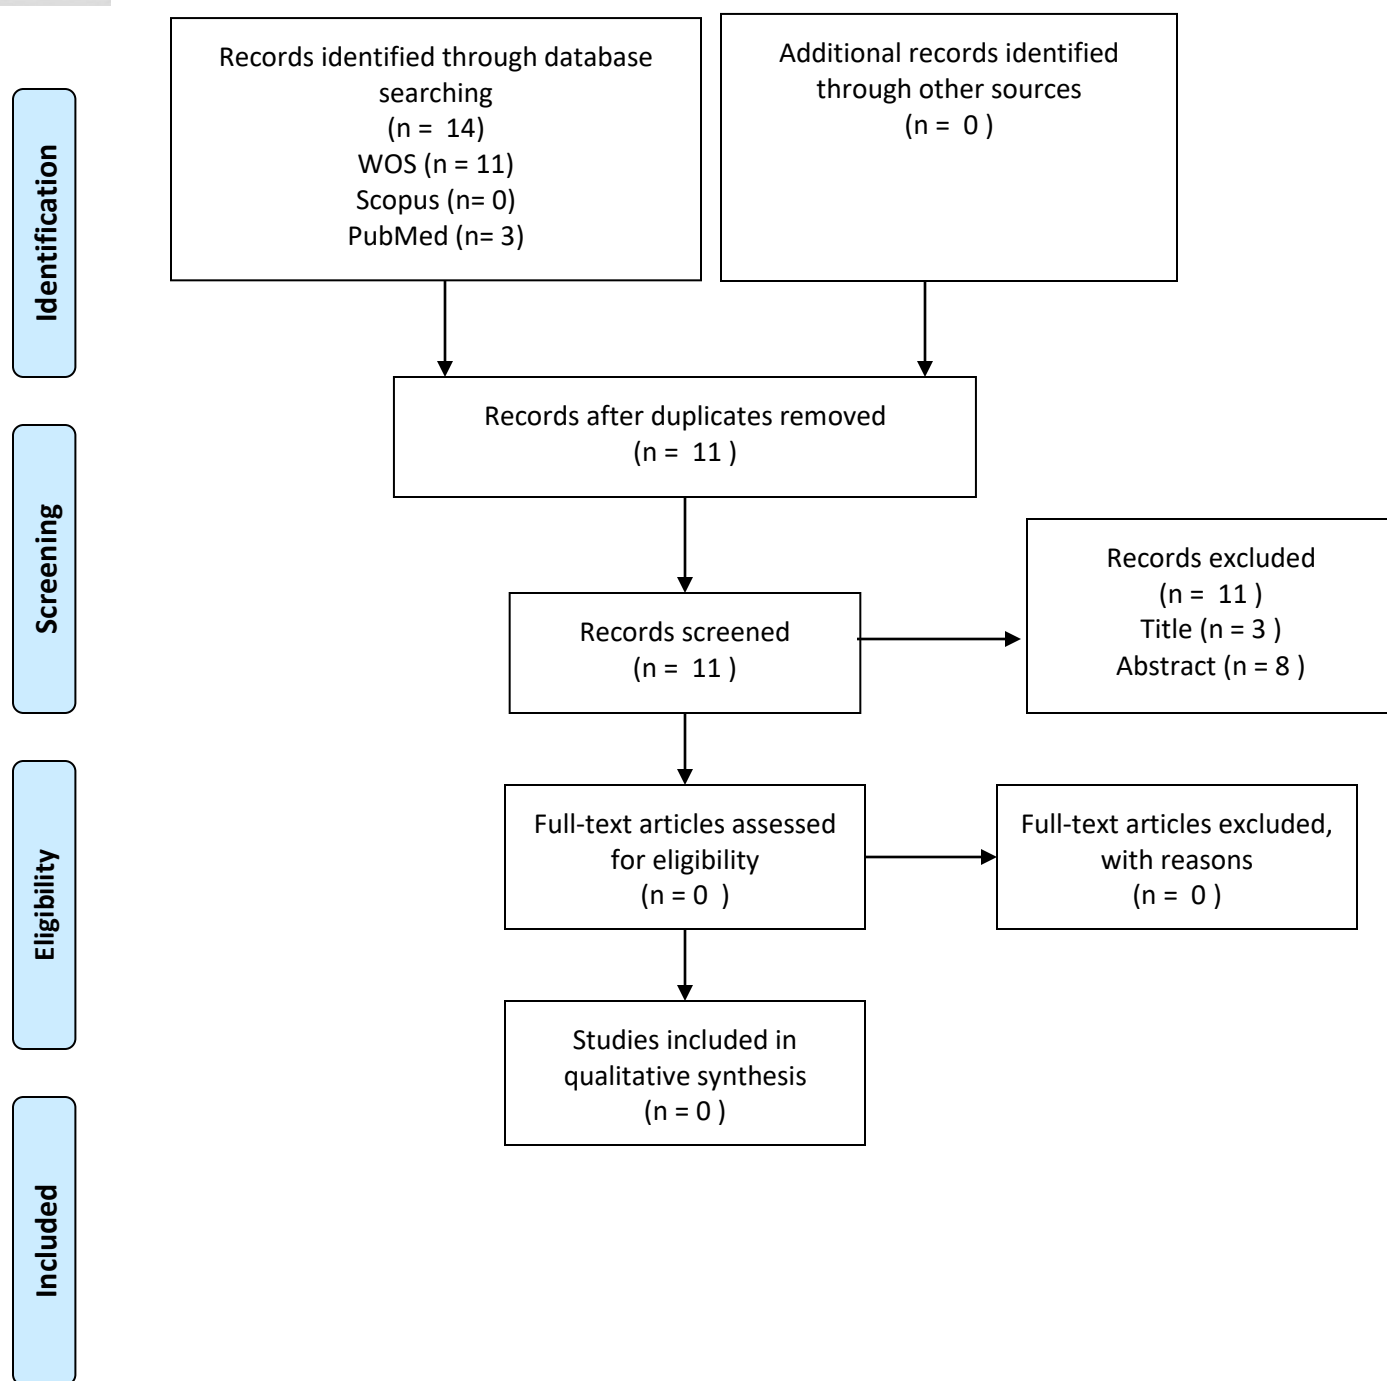



## PRISMA 2009 Flow Diagram \_ Migraine

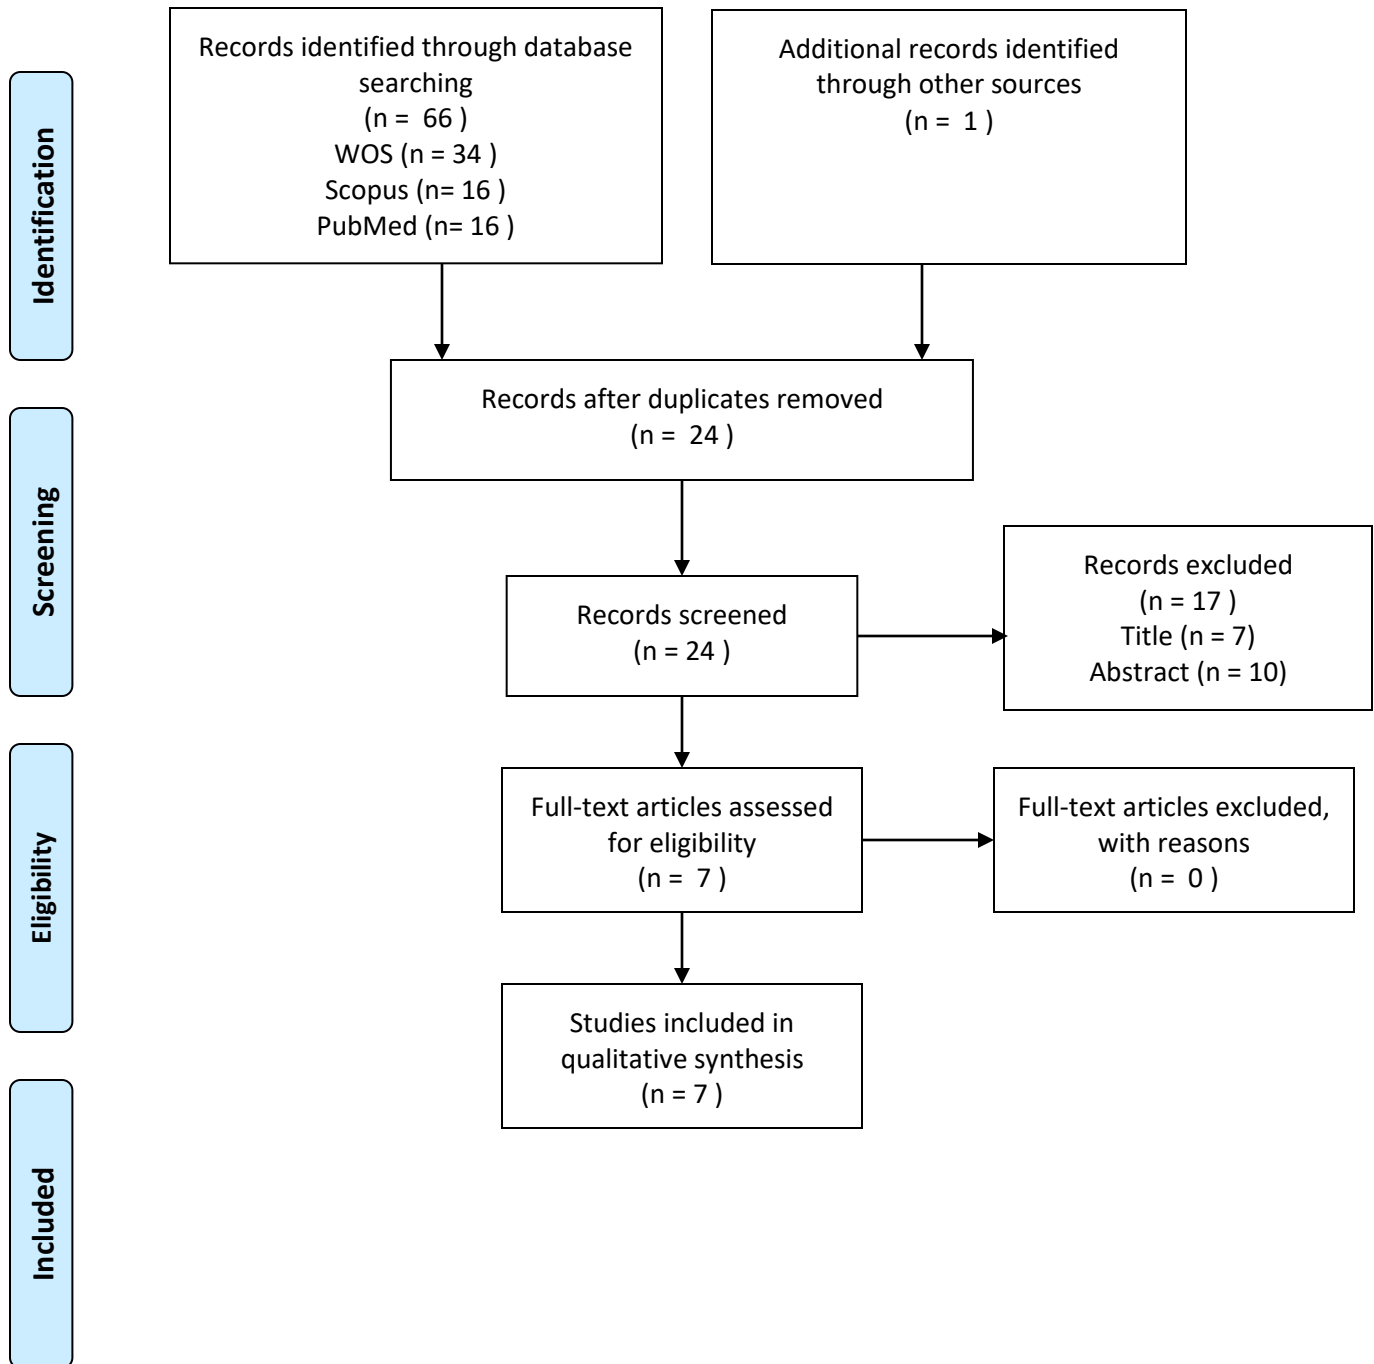

Supplement: s1 [file s1]
